# Supplementary material
Source: PubMed Central journal article supplement (PMC5743496)
Supplement: NIHMS922236-supplement-1.pdf [file NIHMS922236-supplement-1.pdf]

## Supplemental Information

### Dissecting cell-type composition and activity-dependent transcriptional state in mammalian brains by massively parallel single-nucleus RNA-Seq

Peng Hu<sup>1,2,3</sup>, Emily Fabyanic<sup>1,2,3</sup>, Deborah Kwon<sup>1,2</sup>, Sheng Tang<sup>1,2</sup>,  
Zhaolan Zhou<sup>1,2</sup>, and Hao Wu<sup>1,2,4,\*</sup>

<sup>1</sup>Department of Genetics

<sup>2</sup>Epigenetics Institute, Perelman School of Medicine, University of Pennsylvania, Philadelphia PA 19104, USA

<sup>3</sup>These authors contributed equally to this work

<sup>4</sup>Lead Contact

\*Correspondence: [haowu2@pennmedicine.upenn.edu](mailto:haowu2@pennmedicine.upenn.edu) (H.W.)

## Supplemental Figures

**Figure S1:** Quality control and validation of sNucDrop-Seq. Related to Figure 1.

**Figure S2:** Experimental reproducibility, subtype-specific marker gene expression and alternative mRNA processing events. Related to Figure 1 and 2.

**Figure S3:** Sub-type expression signatures of excitatory neurons identified by sNucDrop-Seq agree with previous studies. Related to Figure 3.

**Figure S4:** Expression of IEG genes and PTZ-induced differential gene expression in cortical cell types. Related to Figure 3 and 4.

## Supplemental Tables

**Table S1:** Sample information and sequencing metrics. Related to Figure 1.

**Table S2:** Co-expression patterns and statics of selected activity-regulated genes (ARGs) in excitatory neuronal sub-clusters. Related to Figure 3.

**Figure S1**

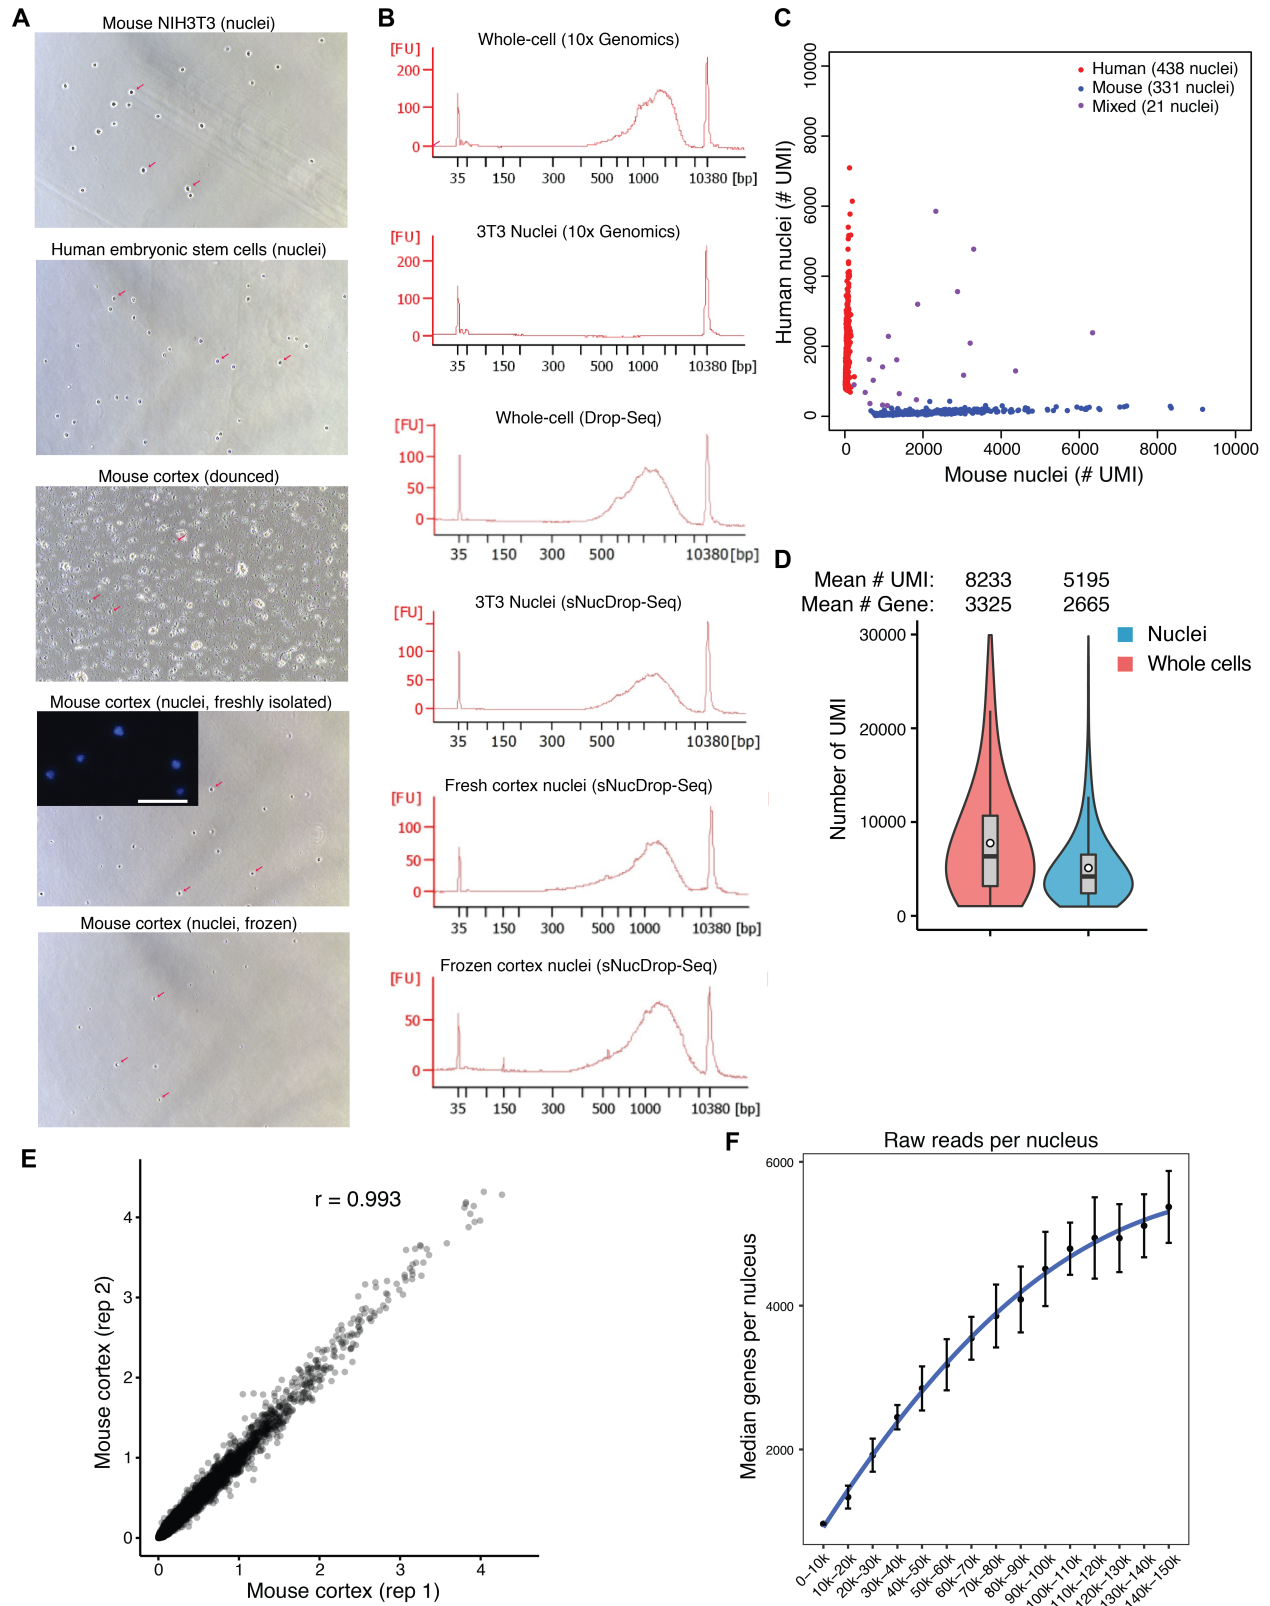

**Figure S1: Quality control and validation of sNucDrop-Seq. Related to Figure 1.**

- (A) After sucrose gradient centrifugation and filtering through cell mesh, mouse (NIH3T3) or human (H7 embryonic stem cell (ESC) line) nuclei were visualized by phase-contrast microscopy (10x). After dounce homogenization, mouse cortical nuclei were visualized by phase-contrast microscopy (10x) before (top) or after (bottom) sucrose gradient centrifugation. Red arrows indicate nuclei before or after sucrose gradient centrifugation. The inset indicates fluorescent image of purified nuclei stained with DNA intercalating dye Hoechst 33342 (10 ng/ $\mu$ L). Scale bar, 50  $\mu$ m.
- (B) Bioanalyzer electropherogram of amplified cDNA shown for samples prepared from whole-cell or nuclei by different platforms (10x Genomics platform or Drop-Seq/sNucDrop-Seq). FU, fluorescence units.
- (C) Multi-species nuclei-mixing experiment measures sNucDrop-Seq specificity, by sequencing a mix of human (ESCs) and mouse (NIH3T3) nuclei. Scatter plot shows the number of transcripts (UMIs) associated with annotated human (y-axis) or mouse (x-axis) transcripts for each nucleus (dot). Nuclei with >80% human transcripts are labeled as human (red), and nuclei with >80% mouse transcripts are labeled as mouse (blue). Nuclei with a relatively high percentage of both human and mouse transcripts are labeled as mixed (purple). Of the 790 nuclei that passed quality filter (>800 UMIs), 21 (2.66%) had a mixed phenotype.
- (D) Violin plots illustrating number of transcripts (UMIs) detected by sNucDrop-Seq of nuclei (blue) or whole cells (red) isolated from mouse 3T3 cells by Drop-Seq. Center line: median; circle: mean; limits: first and third quartile; whiskers,  $\pm 1.5$  Inter quartile range (IQR). Indicated on top are the number of cells or nuclei ( $\geq 800$  genes detected), mean number of UMIs per cells/nuclei, and mean number of genes per cells/nuclei.
- (E) Scatter plot showing the high correlation of average expression levels [ $\log(\text{normalized UMI counts} + 1)$ ] between two sNucDrop-Seq biological replicates of mouse cortical cells.
- (F) Median number of genes detected per nucleus at scaling ranges of raw reads per nucleus. Data from two independent experiments were included, mean $\pm$ s.e.m.

Figure S2

A

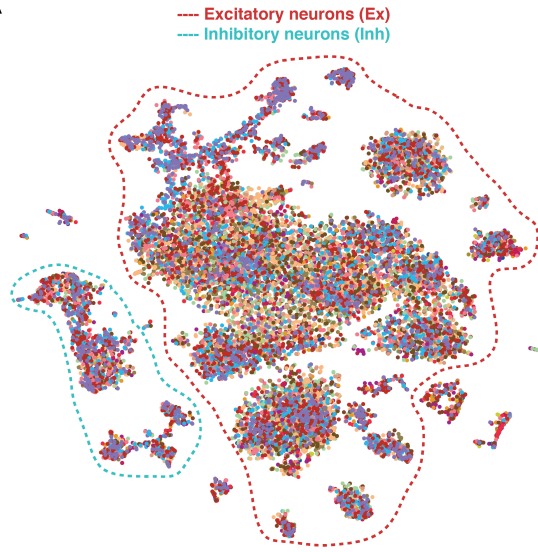

- Animal
- #1
  - #2
  - #3
  - #4
  - #5
  - #6
  - #7
  - #8
  - #9
  - #10
  - #11
  - #12
  - #13
  - #14
  - #15
  - #16
  - #17

C

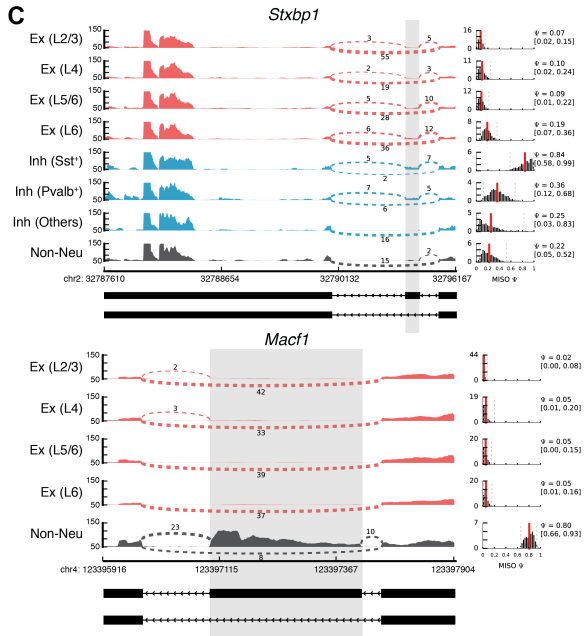

B

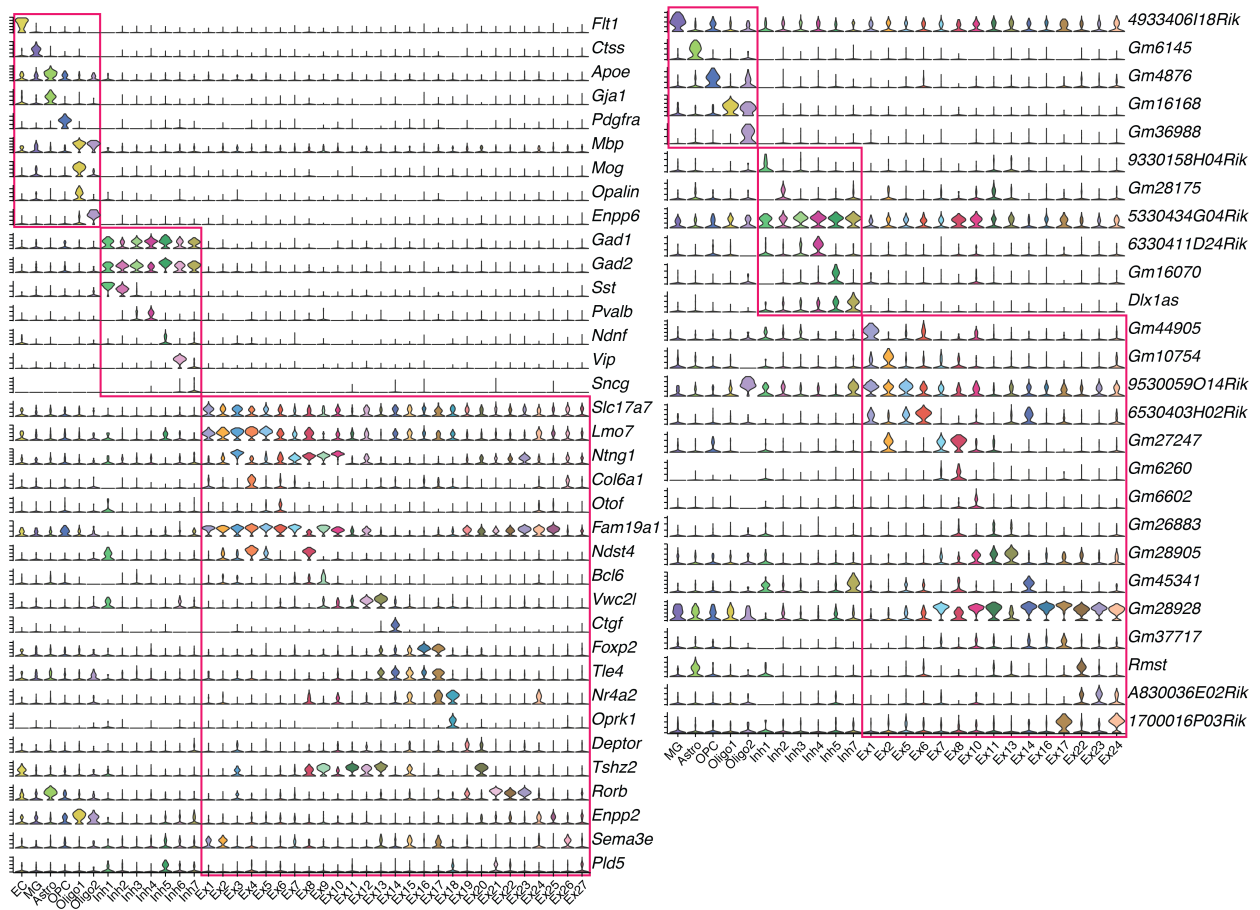



**Figure S2: Experimental reproducibility, subtype-specific marker gene expression and alternative mRNA processing events. Related to Figure 1 and 2.**

- (A) The tSNE plot (the same plot as in Figure 1C) with all nuclei colored according to animal identification (ID) code. Clusters corresponding to excitatory (red dashed line) and inhibitory (blue dashed line) neurons are grouped together.
- (B) Protein-coding (left) and non-coding (right) marker genes identified for neuronal and non-neuronal subtypes. Violin plots illustrating select protein-coding (left) and non-coding marker gene expression for excitatory neuronal (Ex1-27), inhibitory neuronal (Inh 1-7) and non-neuronal (Astro, OPC, Oligo, MG, EC) cell clusters.
- (C) Cell-type-specific alternative splicing events revealed by sNucDrop-Seq. Sashimi plot of exon skipping events associated with the *Stxbp1* (top) or *Macf1* (bottom) in each cell type. Left panel: upper histograms show the read coverage along the exons. Junction reads are visualized by a dashed curve to indicate the splice event, and the number of junction reads were indicated in the center of dashed curve. The bottom schematic diagram shows the exon (wider bars) and intron (black line) structure of two annotated isoforms (inclusion and exclusion of an exon), with the direction of transcription indicated by arrows along the intron. The variably present exon is highlighted with grey rectangle. Right panel: the posterior distribution of MISO expression estimates ( $\Psi$  or PSI: percentage spliced in) that represent the fraction of the inclusion isoform for a gene in each cell type. The red line indicates the  $\Psi$  estimate, and the lower and upper 95% confidence intervals are plotted as dotted grey lines. The actual value of  $\Psi$  and 95% CI are showed in the right of the histograms.

**Figure S3**

**A**

15,353 nuclei (ex neurons)

|                     |                                                                                                                                                                                                                                                                                                                                                                                                                                                  |
|---------------------|--------------------------------------------------------------------------------------------------------------------------------------------------------------------------------------------------------------------------------------------------------------------------------------------------------------------------------------------------------------------------------------------------------------------------------------------------|
| <b>L2/3 (36.7%)</b> | Ex25 (n=3,628; 23.6%): <i>Enpp2, Calb1</i><br>Ex6 (n=286; 1.86%): <i>Otof, Ngb</i><br>Ex24 (n=212; 1.38%): <i>Ptgs2, Calb1</i><br>Ex5 (n=461; 3.00%): <i>Otof, Ptgs2</i><br>Ex26 (n=788; 5.13%): <i>Inhba, Ngb</i><br>Ex27 (n=716; 4.66%): <i>Inhba, Enpp2</i>                                                                                                                                                                                   |
| <b>L4 (17.7%)</b>   | Ex22 (n=976; 6.36%): <i>Rorb, Cux2</i><br>Ex21 (n=1,104; 7.19%): <i>Rorb, Tph2</i><br>Ex23 (n=632; 4.12%): <i>Rorb, Hsd11b1</i>                                                                                                                                                                                                                                                                                                                  |
| <b>L5 (20.5%)</b>   | Ex20 (n=180; 1.17%): <i>Batf3, Deptor</i><br>Ex1 (n=164; 1.07%): <i>Arf5, Col6a1</i><br>Ex9 (n=88; 0.57%): <i>Bcl6, Hsd11b1</i><br>Ex19 (n=883; 5.75%): <i>Deptor, Batf3</i><br>Ex12 (n=142; 0.92%): <i>Pde1c, Batf3</i><br>Ex7 (n=1,033; 6.73%): <i>Tcerg1l, Bcl6</i><br>Ex10 (n=169; 1.10%): <i>Qrfpr, Ntng1</i><br>Ex8 (n=77; 0.50%): <i>Stac, Bcl6</i><br>Ex3 (n=128; 0.83): <i>Chrna6, Ntng1</i><br>Ex2 (n=276; 1.80%): <i>Bcl11b, Stac</i> |
| <b>L6a (19.2%)</b>  | Ex4 (n=119; 0.78%): <i>Col6a1, Sla</i><br>Ex13 (n=335; 2.18%): <i>Myl4, Tle4</i><br>Ex16 (n=1,847; 12.0%): <i>Foxp2, Ly6d</i><br>Ex17 (n=91; 0.59%): <i>Foxp2, Tle4</i><br>Ex11 (n=423; 2.76%): <i>Mgp, Ddit4l</i><br>Ex15 (n=128; 0.83%): <i>Mgp, Tle4</i>                                                                                                                                                                                      |
| <b>L6b (3.04%)</b>  | Ex14 (n=305; 1.99%): <i>Ctgf, Tnmd</i><br>Ex18 (n=162; 1.06%): <i>Rgs12, Cdh13</i>                                                                                                                                                                                                                                                                                                                                                               |

**B**

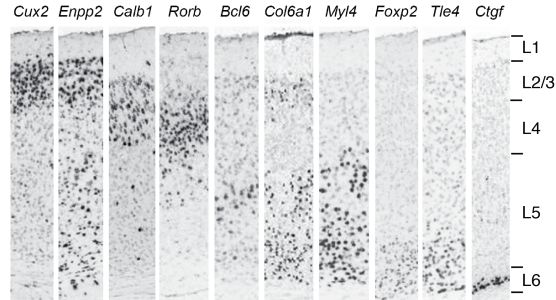

**E**

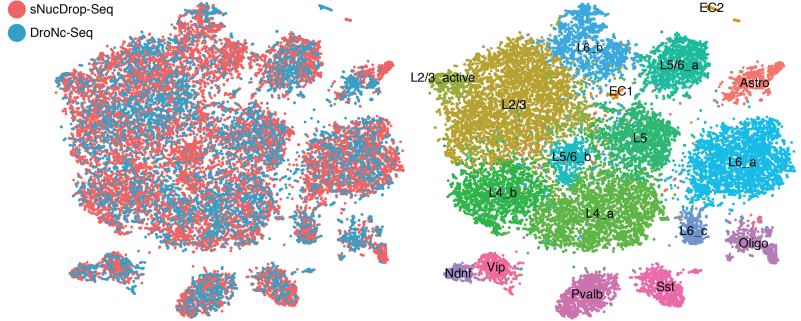

**C**

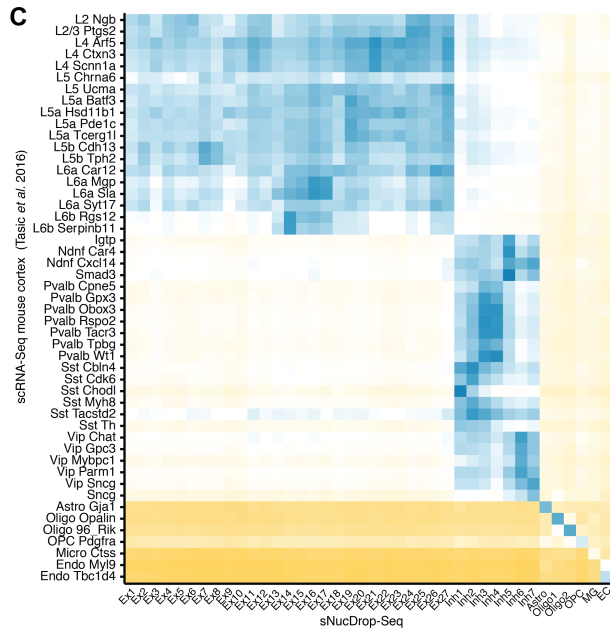

**F**

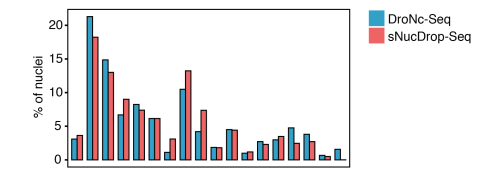

**G**

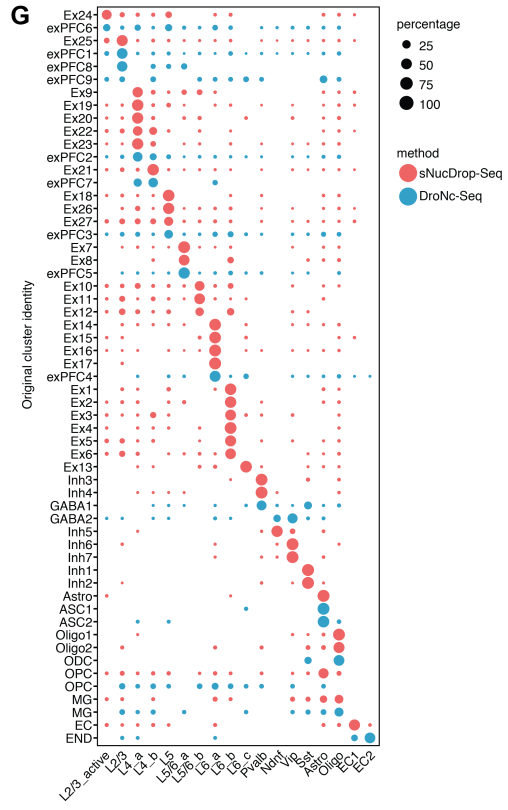

**D**

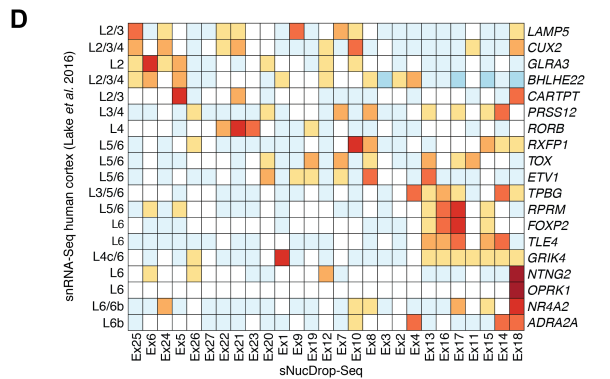

**Figure S3: Sub-type expression signatures of excitatory neurons identified by sNucDrop-Seq agree with previous studies. Related to Figure 3.**

(A) Summary of cortical excitatory neuronal subtypes identified by sNucDrop-Seq.

Glutamatergic neuronal subtypes are grouped according to cortical layer distribution. Also shown are number of nuclei per subtype and representative marker genes for each subtype.

(B) RNA in situ hybridization (ISH) showing layer-specific expression of selected markers in the mouse adult cortex (postnatal day 56, Allen Brain Atlas).

(C) Cell-type-specific expression signatures (identified by sNucDrop-Seq) agree with previously published work. Pairwise correlations of the average expression (Methods) for the genes in each cell-type signature defined by sNucDrop-Seq and cell-types defined by single-cell RNA-Seq in the mouse visual cortex (Tasic et al., 2016).

(D) Heatmap showing select human marker gene expression for cortical excitatory neuronal subpopulations identified in Figure 1C. The human marker gene list is derived from single-nucleus RNA-Seq of adult human cortex (Lake et al., 2016).

(E) Integrative analysis of sNucDrop-Seq and DroNc-Seq data sets of adult mouse cortex. A tSNE plot of 17,876 sNucDrop-Seq (fresh mouse whole cortex) and 5,337 DroNc-Seq (frozen mouse prefrontal cortex) (Habib et al., 2017) nuclei profiles (>800 genes per nucleus). Nuclei (dots) are colored by method (left) and cluster membership (right) that is labeled *post hoc* according to cell-type, cortical layer distribution (L2/3, L4, L5/6, and L6), and transcriptional state of neuronal activity regulated genes (L2/3\_active versus L2/3).

(F) Fraction of either sNucDrop-Seq (red) or DroNc-Seq (blue) nuclei from each cortical cell-types. Cell types are defined as in Figure S3E.

(G) Mapping of original cortical cell-type clusters defined by sNucDrop-Seq (red) and DroNc-Seq (blue) to clusters defined by combined data sets in Figure S3E. Dot plot shows the proportion of nuclei in each cluster defined by two different methods that were classified to each cluster defined by combined data sets. DroNc-Seq clusters: exPFC, excitatory neurons; GABA, inhibitory neurons; ASC, astrocytes; OPC, oligodendrocyte precursor cells; ODC, oligodendrocytes; MG, microglia; END, endothelial cells. sNucDrop-Seq clusters: Ex, excitatory neurons; Inh, inhibitory neurons; Astro, astrocytes; OPC, oligodendrocyte precursor cells; Oligo, oligodendrocytes; MG, microglia; EC, endothelial cells;

**Figure S4**

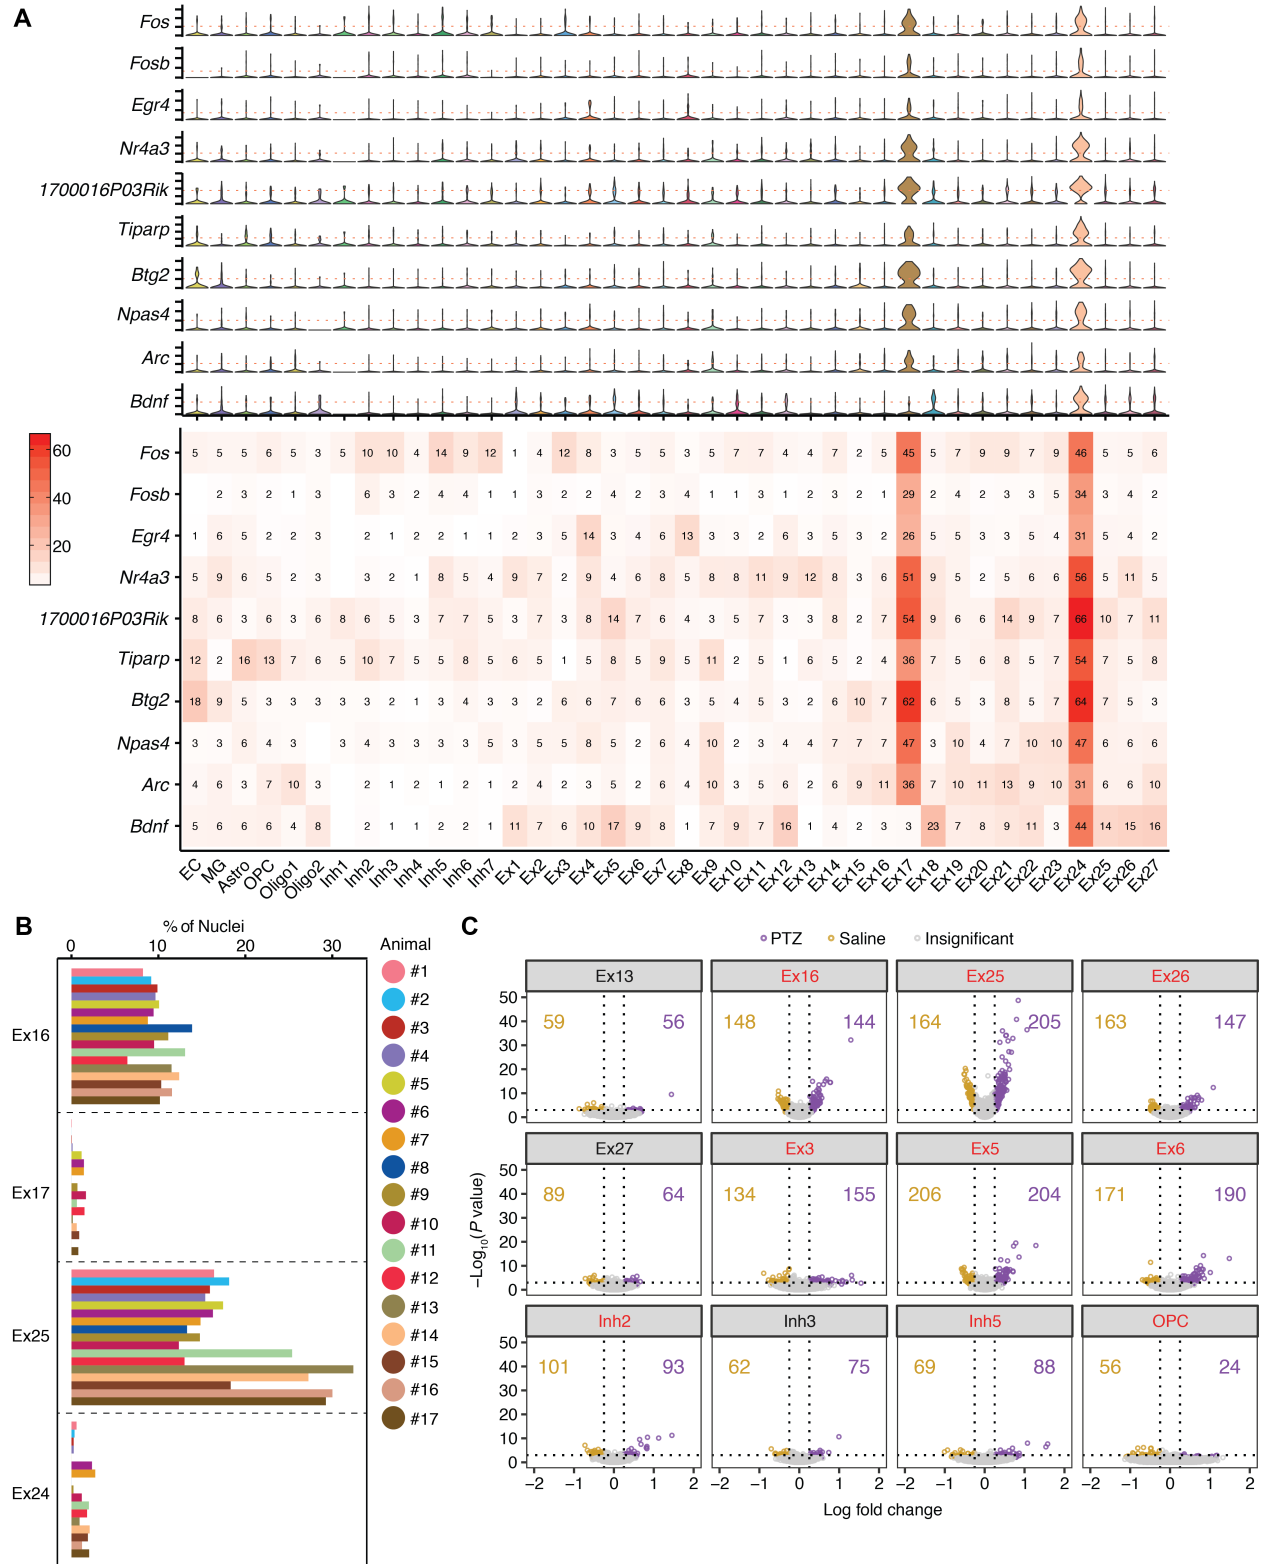

**Figure S4: Expression of IEG genes and PTZ-induced differential gene expression in cortical cell types. Related to Figure 3 and 4.**

- (A) Violin plots (top) showing the distribution of the expression level of select IEGs in all cortical cell-types. Dashed line (mean + 2 SD) marks the background level of IEG expression that is used to call IEG-expressing nuclei. Heatmap (bottom) showing percentage of nuclei expressing select IEGs in all cortical cell-types. The number indicates the percentage of IEG-expressing nuclei over total number of nuclei in each cluster. SD, standard deviation.
- (B) Percentage of nuclei for each animal (colored according to animal ID in Figure S2A) in clusters Ex16, Ex17, Ex 24 and Ex 25.
- (C) Identification of differentially expressed genes between PTZ and saline treatment for representative clusters. Significant genes with p-values less than 0.01 and absolute natural log fold changes greater than 0.25 was colored (purple or yellow). The cluster identified by GSEA as enriched for activity-dependent genes (FDR<0.2) is highlighted in red.

**Table S1: Sample information and sequencing metrics. Related to Figure 1.**

| Sample name <sup>1</sup> | Data type    | Animal id <sup>2</sup> | Mouse strain     | Cell-type/<br>Brain region | Sex | Age<br>(approx.) | Drug<br>treatment | Total reads | Uniquely<br>mapped reads | UMI #      | Cell/nucleus #<br>(>800 genes) | Read # (x1000)<br>per cell/nucleus <sup>3</sup> |
|--------------------------|--------------|------------------------|------------------|----------------------------|-----|------------------|-------------------|-------------|--------------------------|------------|--------------------------------|-------------------------------------------------|
| cell-3T3                 | Drop-Seq     | N/A                    | N/A              | NIH3T3                     | N/A | N/A              | N/A               | 95,093,080  | 62,024,451               | 9,550,135  | 1,160                          | 25.1                                            |
| nuclei-3T3               | sNucDrop-Seq | N/A                    | N/A              | NIH3T3                     | N/A | N/A              | N/A               | 152,135,088 | 99,618,264               | 10,309,036 | 1,987                          | 22.7                                            |
| nuclei-ctx-1             | sNucDrop-Seq | #8                     | C57BL/6J         | whole cortex               | M   | 6-10 wk          | N/A               | 26,721,375  | 17,753,847               | 1,371,024  | 185                            | 36.6                                            |
| nuclei-ctx-2             | sNucDrop-Seq | #9                     | C57BL/6J         | whole cortex               | M   | 6-10 wk          | N/A               | 50,695,703  | 35,815,095               | 3,136,674  | 474                            | 32.2                                            |
| nuclei-ctx-3             | sNucDrop-Seq | #5                     | C57BL/6J         | whole cortex               | M   | 6-10 wk          | N/A               | 28,669,035  | 28,669,035               | 2,019,055  | 276                            | 30.2                                            |
| nuclei-ctx-4             | sNucDrop-Seq | #10                    | C57BL/6J         | whole cortex               | M   | 6-10 wk          | N/A               | 94,491,277  | 73,085,661               | 4,673,340  | 529                            | 60.3                                            |
| nuclei-ctx-5             | sNucDrop-Seq | #6                     | C57BL/6J         | whole cortex               | M   | 6-10 wk          | N/A               | 80,648,373  | 65,889,268               | 7,565,915  | 1,311                          | 24.1                                            |
| nuclei-ctx-6             | sNucDrop-Seq | #12                    | C57BL/6J         | whole cortex               | M   | 6-10 wk          | N/A               | 92,204,765  | 75,715,967               | 7,116,538  | 817                            | 45.2                                            |
| nuclei-ctx-7             | sNucDrop-Seq | #7                     | C57BL/6J         | whole cortex               | M   | 6-10 wk          | N/A               | 106,311,622 | 88,142,394               | 4,853,611  | 950                            | 40.2                                            |
| nuclei-ctx-8             | sNucDrop-Seq | #15                    | C57BL/6J         | whole cortex               | M   | 6-10 wk          | N/A               | 64,698,455  | 52,819,015               | 4,321,996  | 996                            | 19.6                                            |
| nuclei-ctx-9             | sNucDrop-Seq | #11                    | C57BL/6J         | whole cortex               | M   | 6-10 wk          | N/A               | 96,415,484  | 73,829,793               | 3,219,678  | 1,584                          | 7.3                                             |
| nuclei-ctx-10            | sNucDrop-Seq | #16                    | C57BL/6J         | whole cortex               | M   | 6-10 wk          | N/A               | 63,396,599  | 48,694,637               | 901,662    | 537                            | 8.5                                             |
| nuclei-ctx-11            | sNucDrop-Seq | #17                    | C57BL/6J         | whole cortex               | M   | 6-10 wk          | N/A               | 66,081,696  | 53,142,553               | 1,538,201  | 675                            | 10.8                                            |
| nuclei-ctx-12            | sNucDrop-Seq | #14                    | C57BL/6J         | whole cortex               | M   | 6-10 wk          | N/A               | 122,608,270 | 93,228,418               | 5,200,104  | 1,929                          | 8.8                                             |
| nuclei-ctx-13            | sNucDrop-Seq | #13                    | C57BL/6J         | whole cortex               | M   | 6-10 wk          | N/A               | 75,667,980  | 56,551,517               | 3,756,479  | 1,359                          | 9.6                                             |
| nuclei-ctx-saline1       | sNucDrop-Seq | #1                     | C57BL/6J; FVB/NJ | whole cortex <sup>4</sup>  | M   | 10 wk            | Saline            | 92,873,910  | 75,540,881               | 6,754,151  | 2,490                          | 10.4                                            |
| nuclei-ctx-PTZ1          | sNucDrop-Seq | #2                     | C57BL/6J; FVB/NJ | whole cortex <sup>4</sup>  | M   | 10 wk            | PTZ               | 69,812,807  | 57,531,848               | 5,146,303  | 2,326                          | 6.9                                             |
| nuclei-ctx-saline2       | sNucDrop-Seq | #3                     | C57BL/6J; FVB/NJ | whole cortex <sup>4</sup>  | M   | 10 wk            | Saline            | 85,944,486  | 70,173,310               | 6,424,499  | 2,489                          | 8.8                                             |
| nuclei-ctx-PTZ2          | sNucDrop-Seq | #4                     | C57BL/6J; FVB/NJ | whole cortex <sup>4</sup>  | M   | 10 wk            | PTZ               | 84,952,663  | 70,034,705               | 4,809,316  | 2,093                          | 9.2                                             |

1: sample id in the GEO database (GSE106678).

2: animal id in Figure S2A and S4B.

3: only cells or nuclei with >800 genes detected were included for calculation.

4: a small portion of striatum was included during dissection for comparison.



**Table S2: Coexpression patterns and statics of selected activity-regulated genes (ARGs) in excitatory neuronal sub-clusters. Related to Figure 3.**

| ARG coexpression* | Ex17 (n=91 nuclei)  | Ex16 (n=1,847 nuclei) | Odds ratio (Ex17/ Ex16) | P-value (Ex17 vs Ex16)** |
|-------------------|---------------------|-----------------------|-------------------------|--------------------------|
| Fos-/Egr1-        | 12.1%               | 65.7%                 | 0.07                    | 4.86E-25                 |
| Fos-/Egr1+        | 33.0%               | 27.5%                 | 1.30                    | 2.80E-01                 |
| Fos+/Egr1-        | 12.1%               | 3.6%                  | 3.71                    | 6.83E-04                 |
| Fos+/Egr1+        | 42.9%               | 3.2%                  | 22.62                   | 1.01E-29                 |
| Fos-/Nr4a3-       | 17.6%               | 86.4%                 | 0.03                    | 1.21E-45                 |
| Fos-/Nr4a3+       | 27.5%               | 6.9%                  | 5.12                    | 6.47E-09                 |
| Fos+/Nr4a3-       | 26.4%               | 5.8%                  | 5.76                    | 1.68E-09                 |
| Fos+/Nr4a3+       | 28.6%               | 0.9%                  | 42.67                   | 1.56E-25                 |
| Fos-/Pcsk1-       | 20.9%               | 81.1%                 | 0.06                    | 4.82E-33                 |
| Fos-/Pcsk1+       | 24.2%               | 12.2%                 | 2.30                    | 1.93E-03                 |
| Fos+/Pcsk1-       | 25.3%               | 5.5%                  | 5.78                    | 3.13E-09                 |
| Fos+/Pcsk1+       | 29.7%               | 1.2%                  | 33.23                   | 1.13E-24                 |
| ARG coexpression  | Ex24 (n=212 nuclei) | Ex25 (n=3,628 nuclei) | Odds ratio (Ex24/ Ex25) | P-value (Ex24 vs Ex25)   |
| Fos-/Egr1-        | 22.2%               | 71.9%                 | 0.11                    | 8.55E-48                 |
| Fos-/Egr1+        | 24.5%               | 22.3%                 | 1.13                    | 4.47E-01                 |
| Fos+/Egr1-        | 14.2%               | 3.1%                  | 5.08                    | 8.29E-11                 |
| Fos+/Egr1+        | 39.2%               | 2.6%                  | 23.87                   | 4.07E-62                 |
| Fos-/Nr4a3-       | 19.8%               | 88.8%                 | 0.03                    | 1.50E-108                |
| Fos-/Nr4a3+       | 26.9%               | 5.5%                  | 6.36                    | 7.34E-22                 |
| Fos+/Nr4a3-       | 20.3%               | 5.0%                  | 4.79                    | 9.98E-14                 |
| Fos+/Nr4a3+       | 33.0%               | 0.7%                  | 68.08                   | 3.16E-71                 |
| Fos-/Pcsk1-       | 20.8%               | 77.6%                 | 0.08                    | 3.87E-64                 |
| Fos-/Pcsk1+       | 25.9%               | 16.7%                 | 1.75                    | 9.73E-04                 |
| Fos+/Pcsk1-       | 17.5%               | 4.3%                  | 4.70                    | 5.53E-12                 |
| Fos+/Pcsk1+       | 35.8%               | 1.5%                  | 37.56                   | 9.46E-67                 |

\*: The ARG coexpression patterns are defined based on the expression level of ARGs, as described in Figure 3D.

\*\* : The P-value associated with the odds ratio was calculated by Fisher's exact test.
